# Supplementary material for: Association between Exosomal miRNAs and Coronary Artery Disease by Next-Generation Sequencing
Source: MDPI journal article supplement (doi:10.3390/cells11010098), 2021-12-29

**Supplementary Table S1. Clinical baseline characteristics of the selected population for NGS.**

|                          | Selected CAD (n=52) | Selected Patent (n=52) | <i>p</i> -value |
|--------------------------|---------------------|------------------------|-----------------|
|                          | Mean $\pm$ SD       | Mean $\pm$ SD          |                 |
| Age (yrs)                | 65.04 $\pm$ 10.68   | 60.65 $\pm$ 11.26      | 0.04            |
| Male, N (%)              | 43 (83%)            | 34 (65%)               | 0.04            |
| Waist (cm)               | 82.65 $\pm$ 10.85   | 82.04 $\pm$ 9.24       | 0.76            |
| BMI (kg/m <sup>2</sup> ) | 26.87 $\pm$ 3.80    | 26.42 $\pm$ 3.57       | 0.53            |
| SBP (mm Hg)              | 136.56 $\pm$ 24.1   | 138.58 $\pm$ 25.36     | 0.68            |
| DBP (mm Hg)              | 72.69 $\pm$ 10.95   | 73.67 $\pm$ 13.29      | 0.68            |
| HTN                      | 38 (73%)            | 32 (62%)               | 0.14            |
| DM                       | 20 (38%)            | 14 (27%)               | 0.21            |
| Proteinuria              | 13 (25%)            | 6 (12%)                | 0.06            |
| Smoking                  | 17 (33%)            | 23 (44%)               | 0.23            |
| Alcohol                  | 15 (29%)            | 12 (23%)               | 0.51            |
| Hb (g/dl)                | 13.78 $\pm$ 1.63    | 13.82 $\pm$ 1.62       | 0.66            |
| Glu AC (mg/dL)           | 132.48 $\pm$ 33.18  | 121.75 $\pm$ 40.38     | 0.15            |
| HbA1C (mg/dL)            | 6.32 $\pm$ 0.79     | 6.8 $\pm$ 2.49         | 0.66            |
| GOT (U/L)                | 23.64 $\pm$ 5.79    | 19.21 $\pm$ 6.17       | 0.17            |
| GPT (U/L)                | 26.85 $\pm$ 6.01    | 26.55 $\pm$ 7.29       | 0.82            |
| BUN (mg/dL)              | 18.84 $\pm$ 5.91    | 17.24 $\pm$ 4.6        | 0.13            |
| Cr (mg/dL)               | 1.09 $\pm$ 0.56     | 0.92 $\pm$ 0.2         | 0.03            |
| Na (mmol/L)              | 137.62 $\pm$ 1.95   | 137.58 $\pm$ 2.57      | 0.93            |
| K (mmol/L)               | 4.07 $\pm$ 0.35     | 4 $\pm$ 0.35           | 0.31            |
| CHO (mg/dL)              | 151.45 $\pm$ 34.61  | 165.78 $\pm$ 29.53     | 0.03            |
| TG (mg/dL)               | 149.8 $\pm$ 84.49   | 146.1 $\pm$ 66.84      | 0.81            |
| LDL (mg/dL)              | 87.96 $\pm$ 28.28   | 99.73 $\pm$ 25.11      | 0.03            |
| HDL (mg/dL)              | 37.73 $\pm$ 5.97    | 43.88 $\pm$ 6.29       | 0.04            |
| CRP (mg/dL)              | 0.06 $\pm$ 0.01     | 0.11 $\pm$ 0.06        | 0.35            |

All results were expressed as means and standard deviations (Mean  $\pm$  SD) for both men and women. NGS, next-generation sequencing; CAD, coronary artery disease; BH, body height; BW, body weight; SBP, systolic blood pressure; DBP, diastolic blood pressure; HTN, hypertension; DM, diabetes mellitus; Hb, hemoglobin; Glu AC, fasting blood glucose; HbA1C, hemoglobin A1c; GOT, glutamic oxaloacetic transaminase; GPT, glutamic pyruvic transaminase; BUN, blood urea nitrogen; Cr, creatinine; Na, sodium; K, potassium; CHO, cholesterol; TG, triglyceride; LDL, low-density lipoprotein cholesterol; HDL, high-density lipoprotein cholesterol; CRP, C-reactive protein

**Supplementary Table S2.** The amounts of exosomes from the selected population for NGS.

|           | Selected CAD (n=52)  |          |          | Selected Patent (n=52) |          |          | Mann–Whitney U test |
|-----------|----------------------|----------|----------|------------------------|----------|----------|---------------------|
|           | Mean ± SD            | Median   | IQR      | Mean ± SD              | Median   | IQR      |                     |
| Size (nm) | million particles/ml |          |          | million particles/ml   |          |          | <i>p</i> -value     |
| ≤ 100     | 72410.15±43856.63    | 74635.72 | 50913.68 | 68091.3±32406.54       | 69982.11 | 60551.03 | 0.64                |
| 100 ~ 200 | 12862.35±8429.07     | 12569.21 | 11922.17 | 11948.46±6901.41       | 11838.52 | 10203.41 | 0.65                |
| ≤ 200     | 86072.63±51906.84    | 89996.29 | 63280.61 | 84371±37143.45         | 82762.28 | 72260.87 | 0.74                |
| 200~500   | 145.48±188.56        | 72.43    | 170.80   | 146.43±170.5           | 75.08    | 142.51   | 0.74                |

CAD, coronary artery disease; SD, standard deviation; IQR, interquartile-range.

**Supplementary Table S3. Multiple linear regression for the amounts of exosomes from the selected population for NGS.**

|     | Size $\leq 100$ (nm)           |                 | Size $\leq 200$ (nm)           |                 |
|-----|--------------------------------|-----------------|--------------------------------|-----------------|
|     | $\beta$ (million particles/ml) | <i>p</i> -value | $\beta$ (million particles/ml) | <i>p</i> -value |
| CAD | 7359.98                        | 0.38            | 9087.59                        | 0.36            |
| Age | -412.68                        | 0.29            | -587.80                        | 0.21            |
| Sex | 3350.90                        | 0.72            | -1535.56                       | 0.89            |
| HTN | -4280.23                       | 0.27            | -5037.36                       | 0.26            |
| DM  | 4937.89                        | 0.56            | 5229.06                        | 0.60            |

NGS, next-generation sequencing; CAD, coronary artery disease; HTN, hypertension; DM, diabetes mellitus

Supplementary Figure S1. Study workflow.

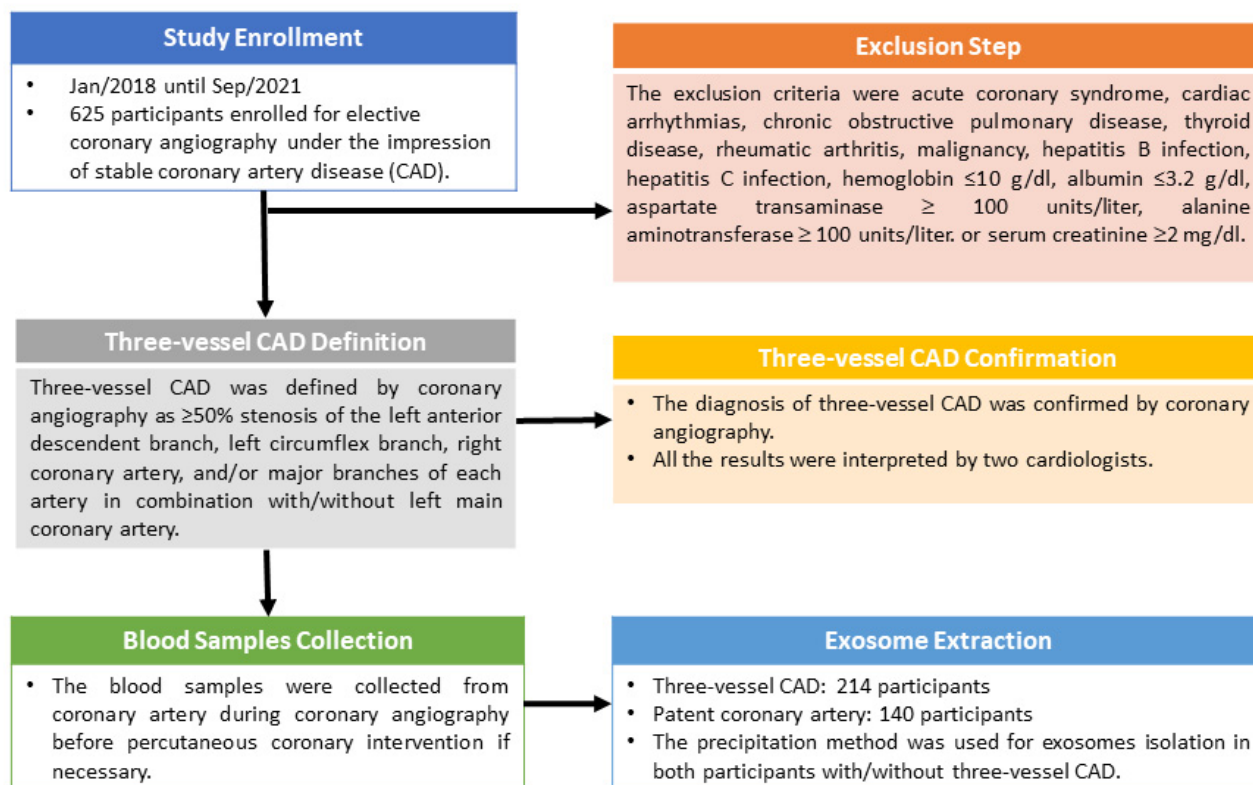

Supplement: s1 [file s1]
